# Supplementary material for: Designing a thiol specific fluorescent probe for possible use as a reagent for intracellular detection and estimation in blood serum: kinetic analysis to probe the role of intramolecular hydrogen bonding
Source: Royal Society of Chemistry journal article supplement (doi:10.1039/c3ob41284a), 2013-01-01
Supplement: c3ob41284a.pdf [file c3ob41284a.pdf]

## **Supplementary information**

# **Designing Thiol Specific Fluorescent Probe for a Possible Use as a Reagent for Intracellular Detection and Estimation in Blood Serum: Kinetic Analysis for Probing the Role of Intra Molecular Hydrogen Bonding**

*Priyadip Das,<sup>a</sup> Amal Kumar Mandal,<sup>a</sup> Upendar Reddy G,<sup>a,b</sup> Mithu Baidya,<sup>c</sup> Sudip K. Ghosh<sup>c\*</sup> and Amitava Das<sup>a,b\*</sup>*

<sup>a</sup>CSIR-Central Salt and Marine Chemicals Research Institute, Bhavnagar: 364002, Gujarat, India

<sup>b</sup>Present address: Organic Chemistry Division, CSIR-National Chemical Laboratory, Pune: 411008, Maharashtra, India; Fax: +91(0)2025902629; E-mail: [a.das@ncl.res.in](mailto:a.das@ncl.res.in)

<sup>c</sup>Department of Biotechnology, Indian Institute of Technology, Kharagpur, West Bengal-721302, India, Email address: [sudip@hijli.iitkgp.ernet.in](mailto:sudip@hijli.iitkgp.ernet.in)

## Table of Contents:

|                                                                                      |     |
|--------------------------------------------------------------------------------------|-----|
| $^1\text{H}$ NMR spectra of <b>L</b> <sub>1</sub>                                    | S12 |
| $^{13}\text{C}$ NMR spectra of <b>L</b> <sub>1</sub>                                 | S13 |
| ESI-mass spectra of <b>L</b> <sub>1</sub>                                            | S14 |
| FTIR spectra of <b>L</b> <sub>1</sub>                                                | S15 |
| $^1\text{H}$ NMR spectra of <b>L</b> <sub>2</sub>                                    | S16 |
| $^{13}\text{C}$ NMR spectra of <b>L</b> <sub>2</sub>                                 | S17 |
| ESI-mass spectra of <b>L</b> <sub>2</sub>                                            | S18 |
| FTIR spectra of <b>L</b> <sub>2</sub>                                                | S19 |
| Fluorescence response of <b>L</b> <sub>1</sub> in presence of different amino acids  | S20 |
| Fluorescence response of <b>L</b> <sub>1</sub> in presence of different amino acids  | S20 |
| ESI-mass spectra of <b>L</b> <sub>1</sub> - <b>ME</b>                                | S21 |
| Fluorescence micrographs of only live HeLa cells                                     | S21 |
| Hydrolytic stability test for <b>L</b> <sub>1</sub> and <b>L</b> <sub>2</sub>        | S22 |
| Determination of detection limit for <b>L</b> <sub>1</sub> and <b>L</b> <sub>2</sub> | S22 |

## $^1\text{H}$ NMR spectra of $\text{L}_1$

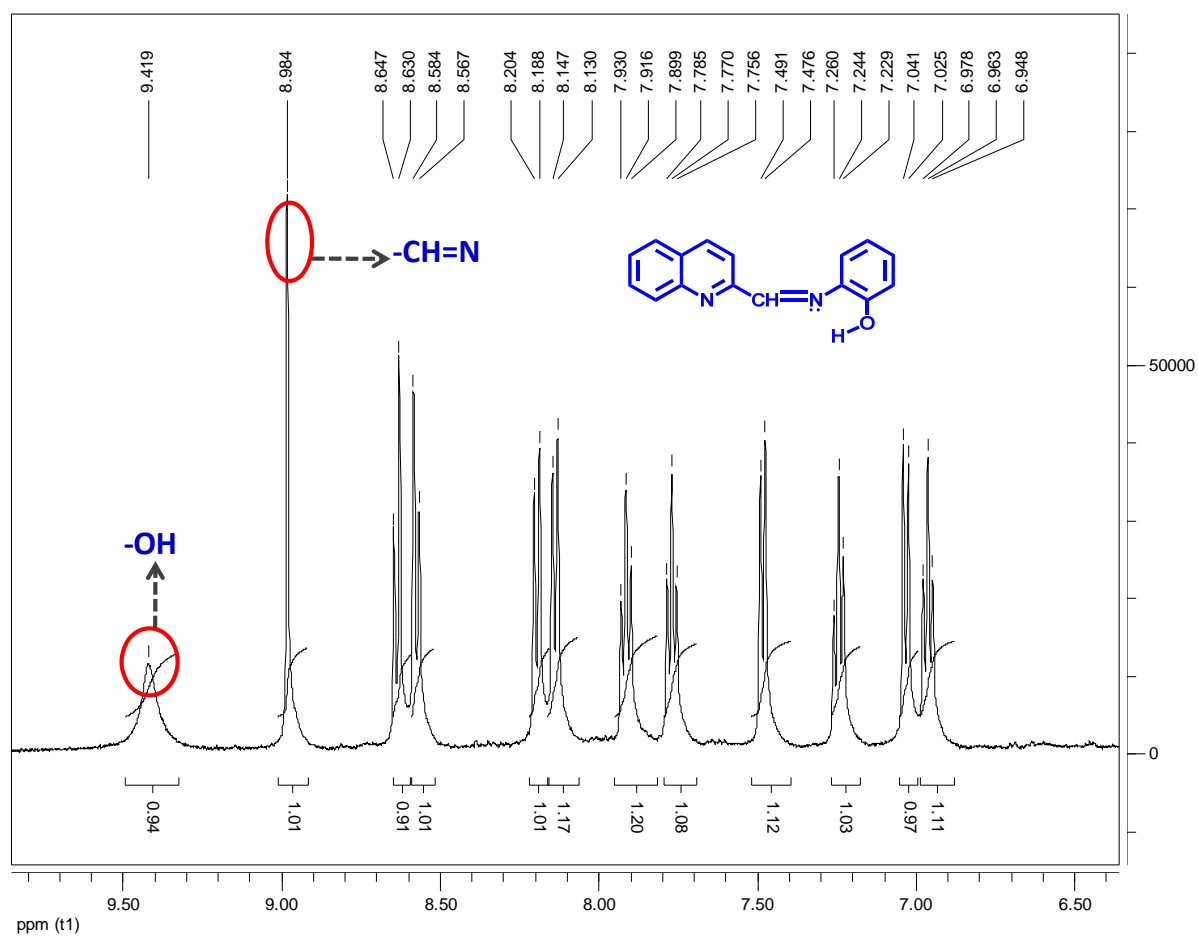

SI Figure 1: Partial  $^1\text{H}$  NMR spectra of  $\text{L}_1$  in  $\text{DMSO-}d_6$  medium.

### **<sup>13</sup>C NMR spectra of L<sub>1</sub>**

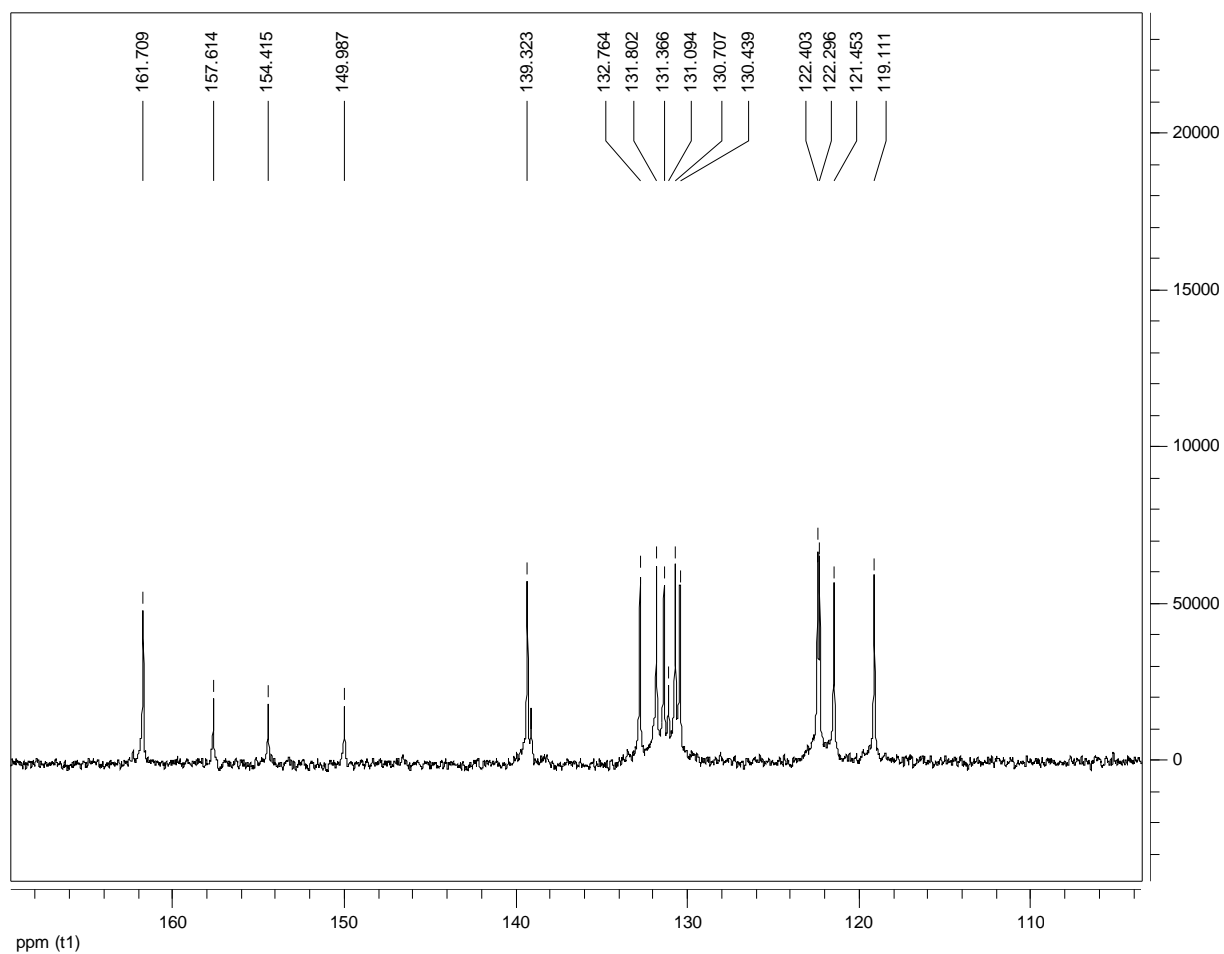

**SI Figure 2:** <sup>13</sup>C NMR spectra of L<sub>1</sub> in DMSO-*d*<sub>6</sub> medium.

### Mass spectra of $L_1$

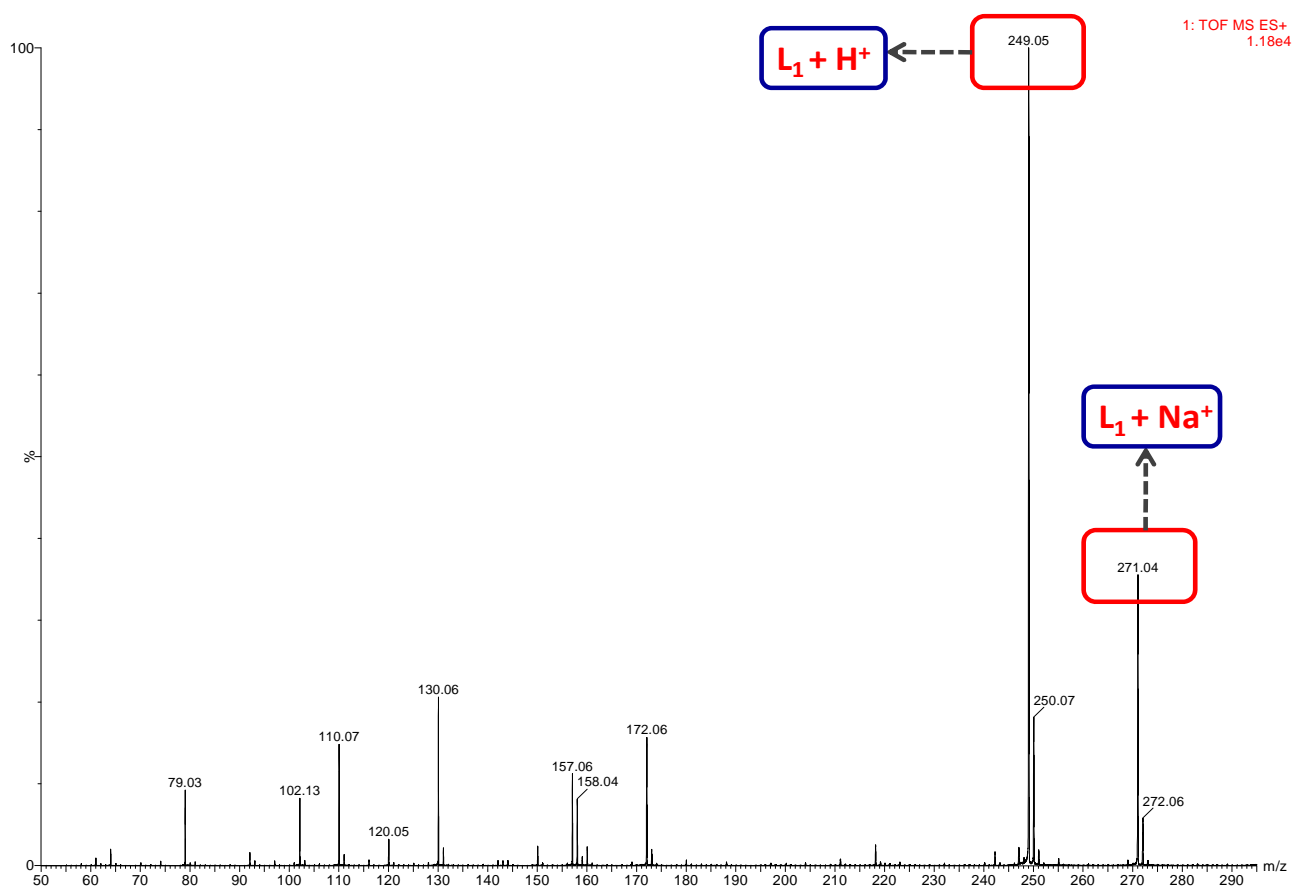

SI Figure 3: ESI- Ms spectrum of  $L_1$ .

### **FTIR spectra of L<sub>1</sub>**

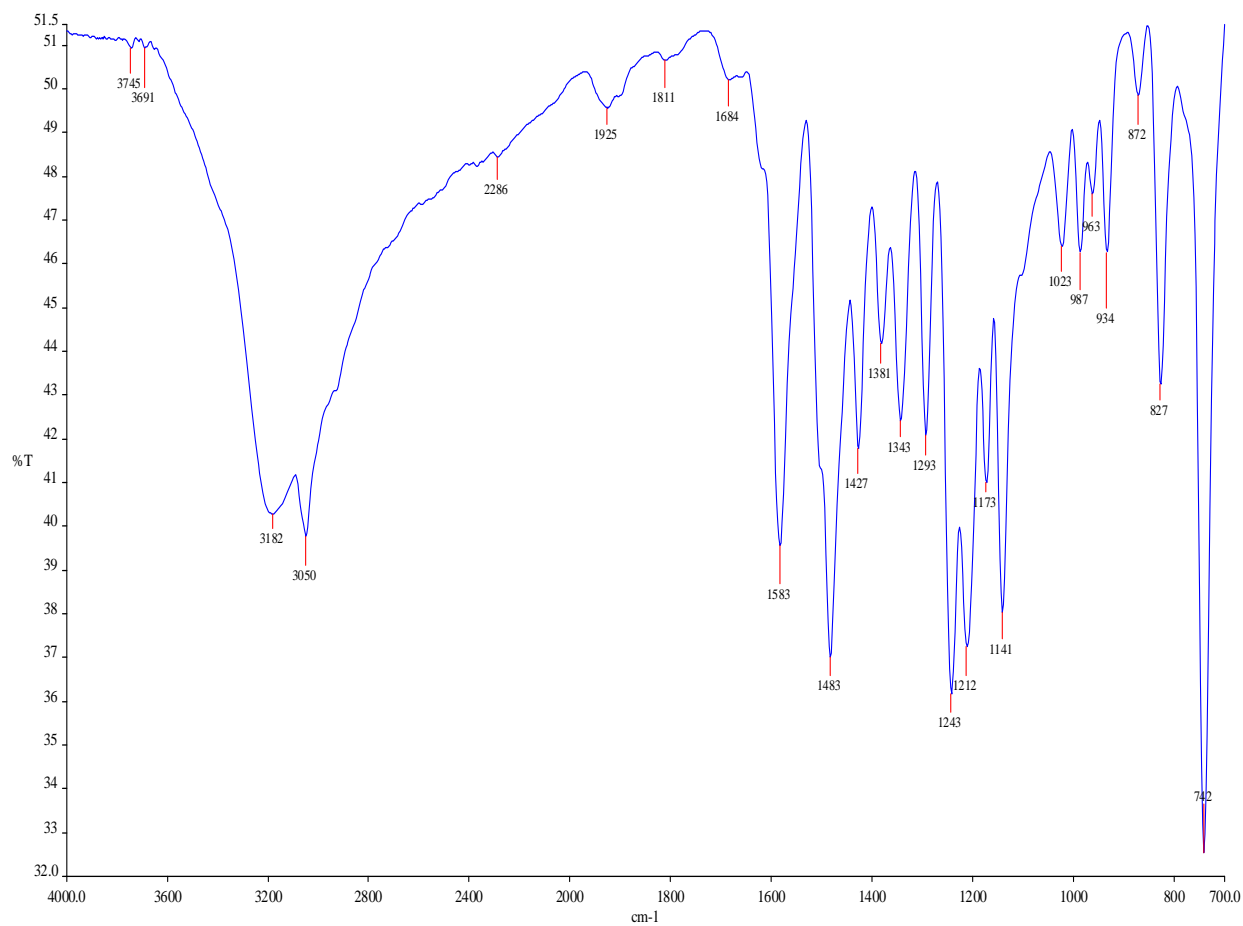

**SI Figure 4:** FTIR spectra of L<sub>1</sub> recorded as KBr pellet.

### <sup>1</sup>H NMR spectra of L<sub>2</sub>

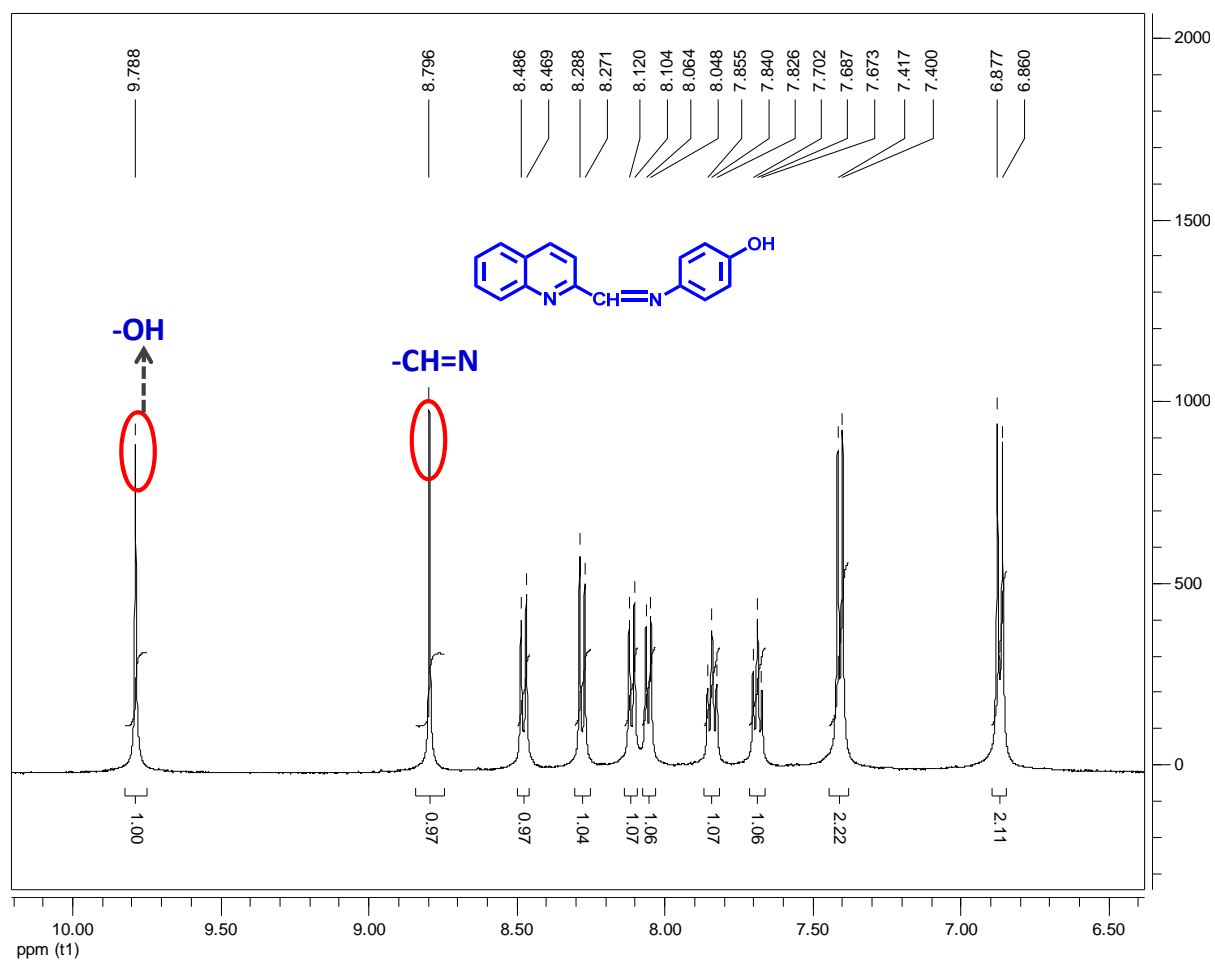

SI Figure 5: Partial <sup>1</sup>H NMR spectra of L<sub>2</sub> in DMSO-*d*<sub>6</sub> medium.

### **<sup>13</sup>C NMR spectra of L<sub>2</sub>**

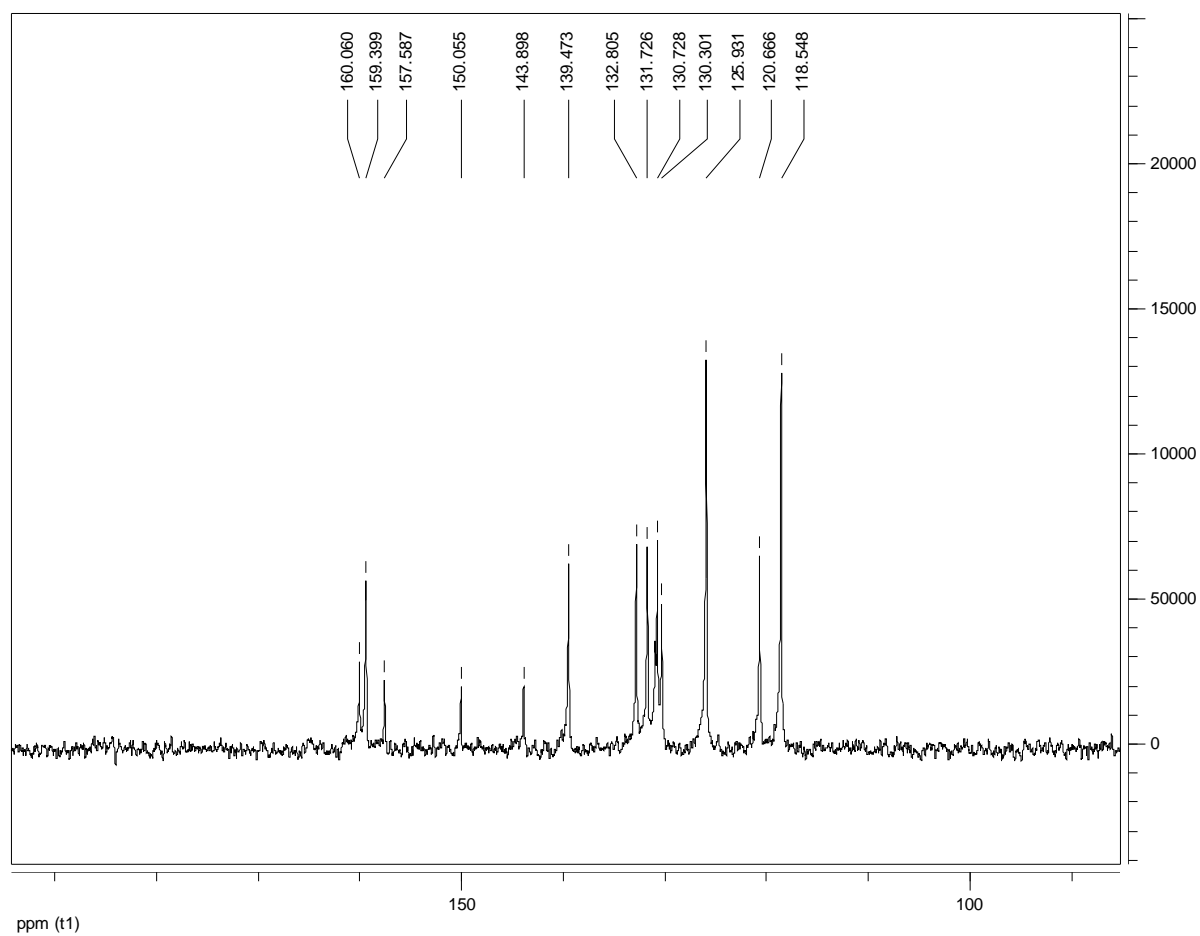

**SI Figure 6:** <sup>13</sup>C NMR spectra of L<sub>2</sub> in DMSO-*d*<sub>6</sub> medium.



### Mass spectra of $L_2$

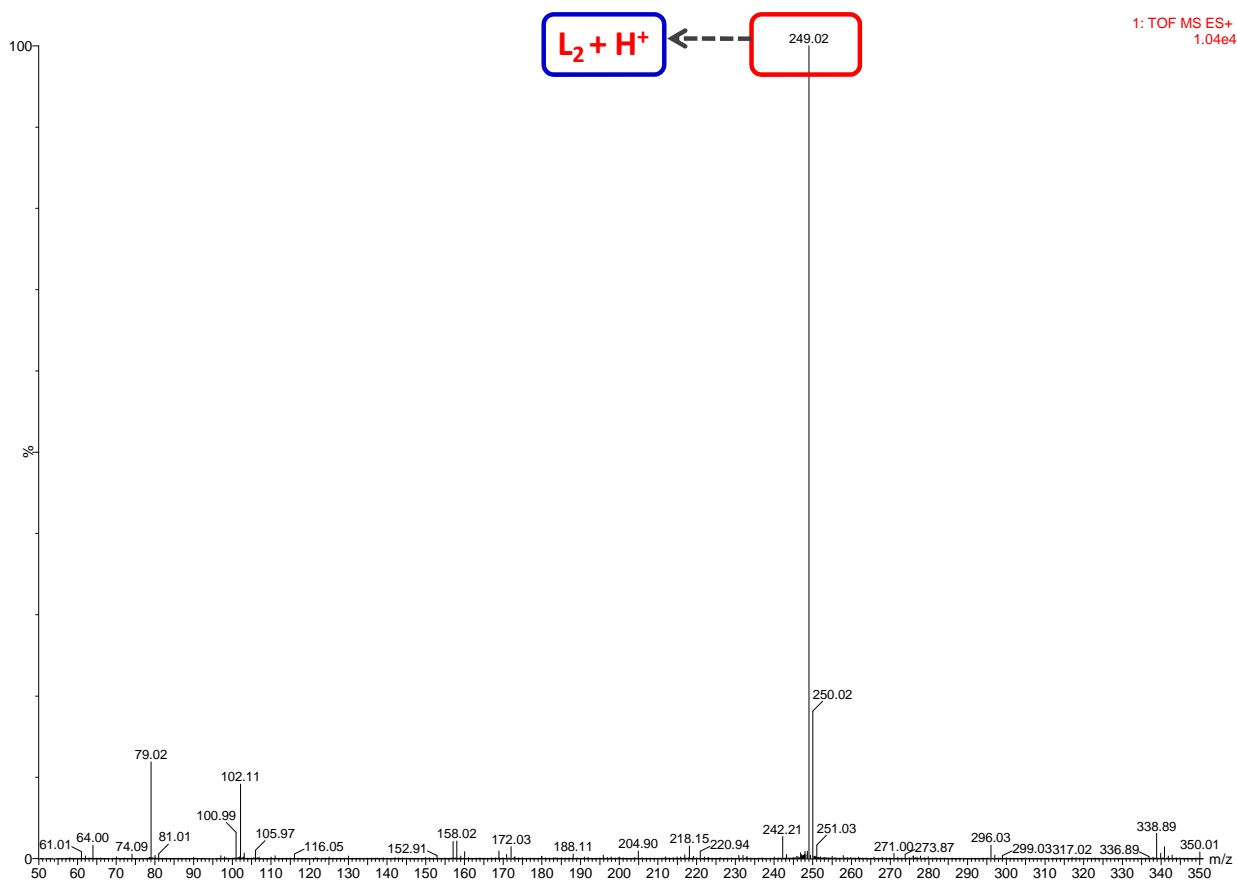

SI Figure 7: ESI-MS spectra of  $L_2$ .

### **FTIR spectra of L<sub>2</sub>**

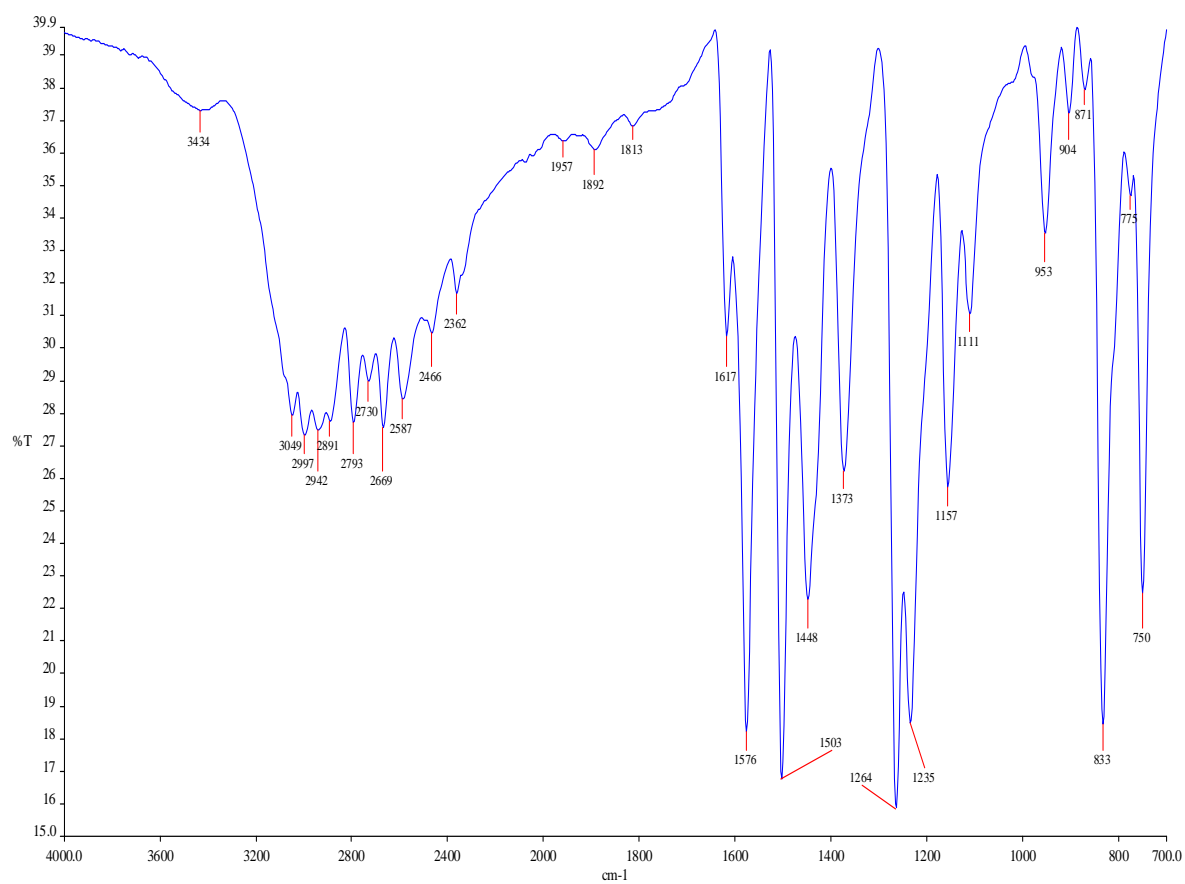

**SI Figure 8:** FTIR spectra of L<sub>2</sub> recorded as KBr pellet.

### Fluorescence response of $L_1$ in presence of different amino acids

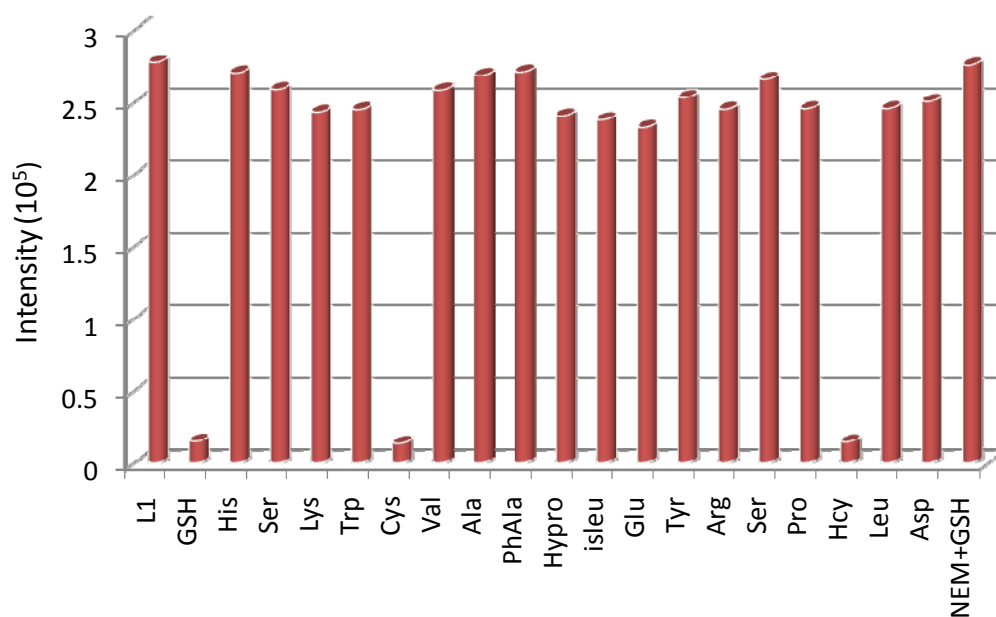

**SI Figure 9:** Fluorescence responses of  $L_1$  (20  $\mu$ M) upon addition of various amino acids (20 mM) in DMSO-aq. HEPES buffer (50mM, 7:3 (v/v); pH 7.4). If GSH was pre-treated with *N*-ethylmaleimide (NEM, a scavenger of GSH), the change in fluorescence intensity of  $L_1$  was insignificant owing to the decrease in the effective concentration of GSH,  $\lambda_{Ext} = 296$  nm,  $\lambda_{Mon} = 342$ nm.

### Fluorescence response of $L_2$ in presence of different amino acids

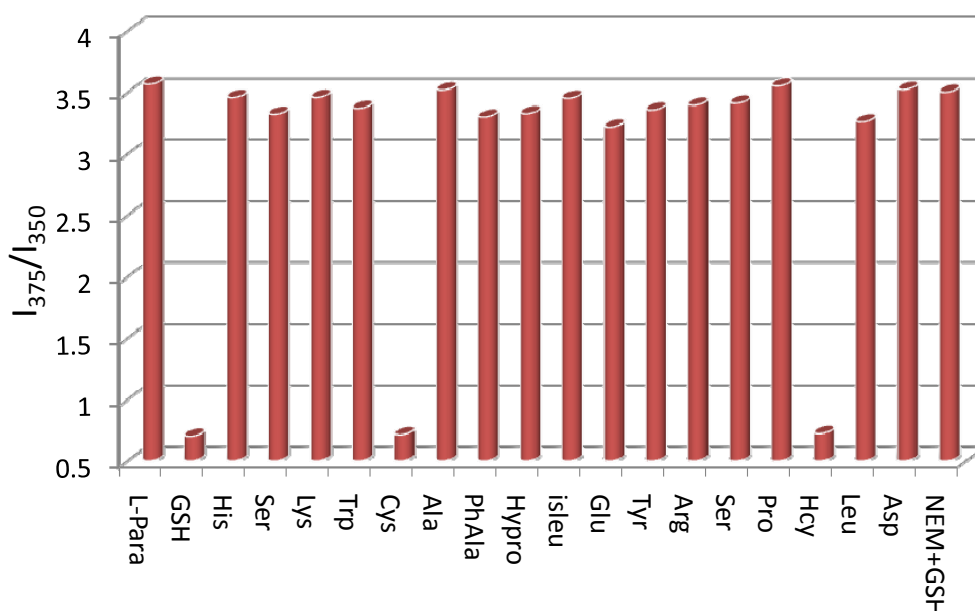

**SI Figure 10:** The change in intensity ratio ( $I_{375}/I_{350}$ ) of  $L_2$  (20  $\mu$ M) upon addition of various amino acids (20 mM) in DMSO-aq. HEPES buffer (50mM, 7:3 (v/v); pH 7.4). If GSH was pre-treated with *N*-ethylmaleimide (NEM, a scavenger of GSH), the change in luminescence intensity ratio ( $I_{375}/I_{350}$ ) of  $L_2$  is insignificant owing to the decrease in the effective concentration of GSH,  $\lambda_{Ext}=291$  nm.



### Hydrolytic stability test of L<sub>1</sub> and L<sub>2</sub>

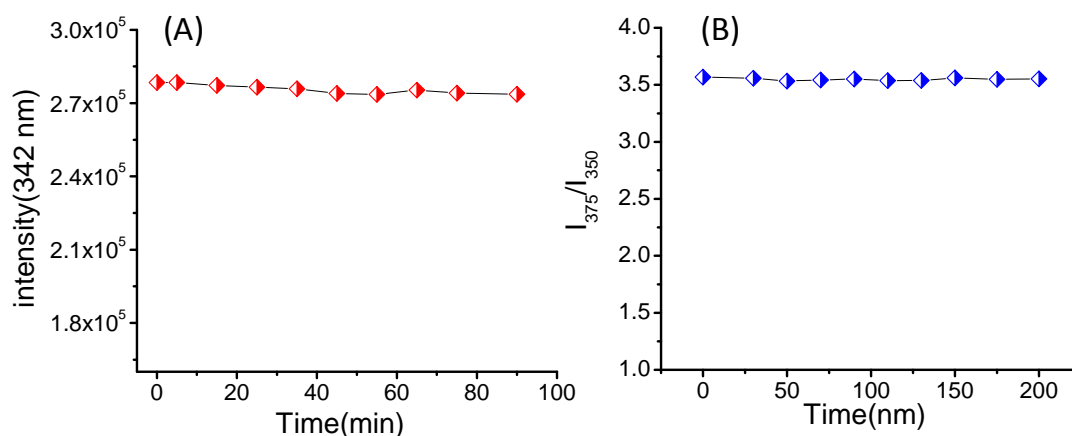

**SI Figure. 13.** (A) A plot of emission intensity of L<sub>1</sub> at 342 nm with time in in DMSO-aq. HEPES buffer (50mM, 7:3 (v/v); pH 7.4) at 25°C,  $\lambda_{\text{Ext}} = 296$  nm. (B) A plot emission intensity ratio (I<sub>375</sub>/I<sub>350</sub>) of L<sub>2</sub> in DMSO-aq. HEPES buffer (50mM, 7:3 (v/v); pH 7.4) at 25°C,  $\lambda_{\text{Ext}} = 291$  nm.

### Determination of detection limit of L<sub>1</sub> and L<sub>2</sub>

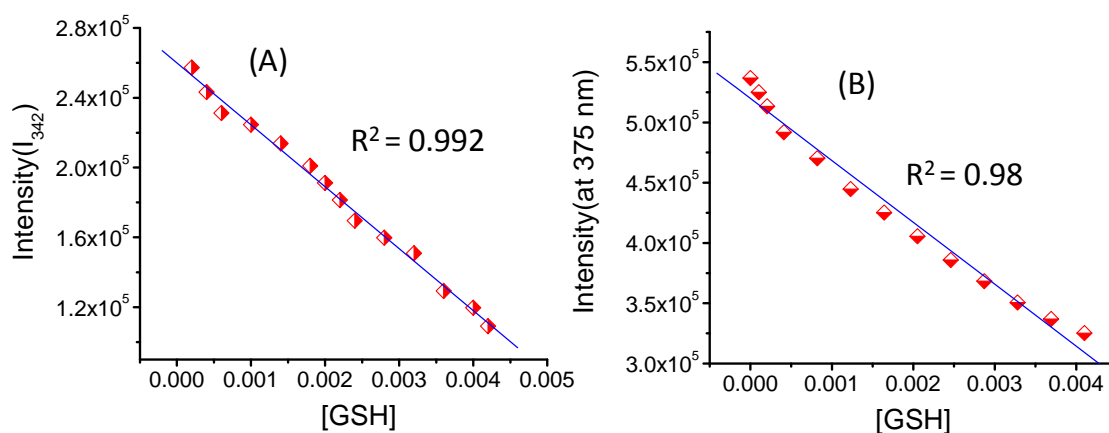

**SI Figure. 14.** (A) Plot of emission intensity of L<sub>1</sub> at 342 nm as a function of various concentrations of GSH in DMSO-aq. HEPES buffer (50mM, 7:3 (v/v); pH 7.4) at 25°C,  $\lambda_{\text{Ext}} = 296$  nm. An assay time of 35 min was chosen for each reaction. (B) Plot of emission intensity of L<sub>2</sub> at 375 nm as a function of various concentrations of GSH in DMSO-aq. HEPES buffer (50mM, 7:3 (v/v); pH 7.4) at 25°C,  $\lambda_{\text{Ext}} = 291$  nm. An assay time of 90 min was chosen for each reaction.
